# Supplementary material for: Advancements in Ocular Regenerative Therapies
Source: MDPI journal article supplement (doi:10.3390/biology12050737), 2023-05-19
Supplement: s1 [file s1]

# Advancements in Ocular Regenerative Therapies

Wojciech Tomczak, Weronika Winkler-Lach, Martyna Tomczyk-Socha and Marta Misiuk-Hojło

Table S1. Summary of the nine clinical trials in retinal diseases.

| Title                                                          | NCT number  | Status     | Design                                                                                                                                                                                                                                                                     | Brief description                                                                                                                     | Age/group demographics | Conditions                                                                                                                                                                                                                                                                                                                                                                                                                                                                                                                                   |
|----------------------------------------------------------------|-------------|------------|----------------------------------------------------------------------------------------------------------------------------------------------------------------------------------------------------------------------------------------------------------------------------|---------------------------------------------------------------------------------------------------------------------------------------|------------------------|----------------------------------------------------------------------------------------------------------------------------------------------------------------------------------------------------------------------------------------------------------------------------------------------------------------------------------------------------------------------------------------------------------------------------------------------------------------------------------------------------------------------------------------------|
| Bone Marrow Derived Stem Cell Ophthalmology Treatment Study II | NCT03011541 | Recruiting | <ul style="list-style-type: none"><li>Intervention Model: Single Group Assignment</li><li>Intervention Model Description: Single Arm- Arm 1. Comparator is natural history of the disease.</li><li>Masking: None (Open Label)</li><li>Primary Purpose: Treatment</li></ul> | Evaluating the use of autologous bone marrow-derived stem cells (BMSC) for the treatment of retinal and optic nerve damage or disease | 18 years and older     | <ul style="list-style-type: none"><li>Retinal Disease</li><li>Age-Related Macular Degeneration</li><li>Retinitis Pigmentosa</li><li>Stargardt Disease</li><li>Optic Neuropathy</li><li>Nonarteritic Ischemic Optic Neuropathy</li><li>Optic Atrophy</li><li>Optic Nerve Disease</li><li>Glaucoma</li><li>Leber Hereditary Optic Neuropathy</li><li>Blindness</li><li>Vision Loss Night</li><li>Vision Loss Partial</li><li>Vision, Low</li><li>Retinopathy</li><li>Maculopathy</li><li>Macular Degeneration</li><li>Retina Atrophy</li></ul> |
|                                                                |             |            | <ul style="list-style-type: none"><li>Multinational</li><li>Multicentre</li></ul>                                                                                                                                                                                          | A follow-up study of patients transplanted in the HOLOCORE clinical trial who consent to participate.                                 | Adults and children    | <ul style="list-style-type: none"><li>Limbal Stem Cell Deficiency Due to Ocular Burn</li></ul>                                                                                                                                                                                                                                                                                                                                                                                                                                               |

|                                                                                                             |             |                        |                                                                                                                                                                                                                                       |                                                                                                                                                                                       |                    |   |                                        |
|-------------------------------------------------------------------------------------------------------------|-------------|------------------------|---------------------------------------------------------------------------------------------------------------------------------------------------------------------------------------------------------------------------------------|---------------------------------------------------------------------------------------------------------------------------------------------------------------------------------------|--------------------|---|----------------------------------------|
| Patients With LSCD Due to Ocular Burns                                                                      |             |                        | <ul style="list-style-type: none"> <li>Time perspective: Prospective</li> <li>Primary Purpose: to collect long-term efficacy and safety data</li> </ul>                                                                               |                                                                                                                                                                                       |                    |   |                                        |
| Cultured Autologous Oral Mucosa Epithelial Sheet for the Treatment of Bilateral Limbal Stem Cell Deficiency | NCT03949881 | Recruiting             | <ul style="list-style-type: none"> <li>Intervention Model: Single Group Assignment</li> <li>Masking: None (Open Label)</li> <li>Primary Purpose: Treatment</li> </ul>                                                                 | A clinical trial performed to evaluate tolerance and efficacy of the autologous jugal mucosa cell sheet cultured using innovative process.                                            | 18 years and older | • | Total Bilateral Limbal Cell Deficiency |
| Treatment of Central Retinal Vein Occlusion Using Stem Cells Study                                          | NCT03981549 | Active, not recruiting | <ul style="list-style-type: none"> <li>Allocation: Randomized</li> <li>Intervention Model: Parallel Assignment</li> <li>Masking: Triple (Participant, Investigator, Outcomes Assessor)</li> <li>Primary Purpose: Treatment</li> </ul> | To evaluate whether intravitreal autologous CD34+ stem cell therapy is safe, feasible and potentially beneficial in eyes with vision loss from central retinal vein occlusion (CRVO). | 18 years and older | • | Central Retinal Vein Occlusion         |
| The Effects of Allogeneic Simple Limbal Epithelial Transplantation                                          | NCT04021134 | Recruiting             | <ul style="list-style-type: none"> <li>Observational Model: Case-Only</li> <li>Time Perspective: Prospective</li> <li>Primary Purpose: assessing the SLET effectiveness</li> </ul>                                                    | To investigate the effect of allogeneic SLET and re-epithelialization after allogeneic SLET.                                                                                          | 10 to 90 years old | • | Limbal Stem-cell Deficiency            |
| Efficacy of Locally Delivered Allogeneic Mesenchymal Stromal Cells                                          | NCT05705024 | Not yet recruiting     | <ul style="list-style-type: none"> <li>Allocation: Randomized</li> <li>Intervention Model: Parallel Assignment</li> <li>Masking: Double (Participant, Care Provider)</li> <li>Primary Purpose: Treatment</li> </ul>                   | The assessment of efficacy of locally delivered allogenic mesenchymal stromal cells on chronic epitheliopathies.                                                                      | 18 years and older | • | Corneal Ulcer                          |

|                                                                                                                                                                         |             |                         |                                                                                                                                                                                     |                                                                                                                                                                                                                       |                    |                                                                                                                                 |
|-------------------------------------------------------------------------------------------------------------------------------------------------------------------------|-------------|-------------------------|-------------------------------------------------------------------------------------------------------------------------------------------------------------------------------------|-----------------------------------------------------------------------------------------------------------------------------------------------------------------------------------------------------------------------|--------------------|---------------------------------------------------------------------------------------------------------------------------------|
| <b>Treatment With Allogeneic Adipose-derived Mesenchymal Stem Cells in Patients With Aqueous Deficient Dry Eye Disease</b>                                              | NCT03878628 | Active, not recruiting  | <ul style="list-style-type: none"> <li>Intervention Model: Single Group Assignment</li> <li>Masking: None (Open Label)</li> <li>Primary Purpose: Treatment</li> </ul>               | To assess the safety and feasibility of allogeneic adipose tissue-derived mesenchymal stem cells injected into the lacrimal gland in patients with Aqueous Deficient Dry Eye Disease.                                 | 18 years and older | <ul style="list-style-type: none"> <li>Dry Eye</li> <li>Kerato Conjunctivitis Sicca</li> <li>Aqueous Tear Deficiency</li> </ul> |
| <b>Ocular Graft-Versus-Host-Disease After Allogeneic Haematopoietic Stem Cell Transplantation</b>                                                                       | NCT05170347 | Recruiting              | <ul style="list-style-type: none"> <li>Observational Model: Cohort</li> <li>Time Perspective: Prospective</li> <li>Primary Purpose: to collect data and expand knowledge</li> </ul> | Ocular GVHD occurs in 30-70% of patients after HSCT. oGVHD can severely impact patients' quality of life. This study aims to understand the population-based epidemiology of oGVHD and long-term ophthalmic outcomes. | 18 years and older | <ul style="list-style-type: none"> <li>Graft Vs Host Disease</li> <li>Haematological Malignancy</li> <li>Cancer</li> </ul>      |
| <b>A Safety Surveillance Study in Subjects with Macular Degenerative Disease Treated With Human Embryonic Stem Cell-derived Retinal Pigment Epithelial Cell Therapy</b> | NCT03167203 | Enrolling by invitation | <ul style="list-style-type: none"> <li>Intervention Model: Single Group Assignment</li> <li>Masking: None (Open Label)</li> <li>Primary Purpose: Treatment</li> </ul>               | To evaluate late-onset adverse events in AIRM-sponsored clinical trial participants who underwent sub-retinal transplants of human embryonic stem cell-derived retinal pigment epithelial (hESC-RPE) cells.           | 18 years and older | <ul style="list-style-type: none"> <li>Macular Degenerative Disease</li> </ul>                                                  |
